# Supplementary material
Source: PubMed Central journal article supplement (PMC2907470)
Supplement: NIHMS209645-supplement-2.pdf [file NIHMS209645-supplement-2.pdf]

## Iron Traffics in Circulation Bound to Siderocalin-Catechol Complex

Guanhu Bao\*, Matthew Clifton\*, Trisha M. Hoette, Kiyoshi Mori, Shi-Xian Deng,  
David Williams, Andong Qiu, Neal Paragas, Thomas Leete, Ritwij Kulkarni, Xiangpo  
Li, Belinda Lee, Avtandil Kalandadze, Adam J. Ratner, Juan Carlos Pizarro,  
Kai M. Schmidt-Ott, Donald W. Landry, Kenneth N. Raymond,  
Roland K.Strong and Jonathan Barasch.

### Supplementary dataset 1: Urinary Compounds and Derivatives (at 10 $\mu$ M)

|           | Compounds IUPAC name                                                                                       | Compound                       | Purity<br>(Company) | Paper<br>Chromatography<br>Fe Solubilization | %Retention of<br>55Fe complex<br>by Scn-Ngal |
|-----------|------------------------------------------------------------------------------------------------------------|--------------------------------|---------------------|----------------------------------------------|----------------------------------------------|
| <b>1</b>  | benzene-1,2-diol                                                                                           | Catechol                       | 99%<br>(Fluka)      | Yes                                          | 56                                           |
| <b>2</b>  | 3-methylbenzene-1,2-diol                                                                                   | 3-methylcatechol               | 98%<br>(Aldrich)    | Yes                                          | 56                                           |
| <b>3</b>  | 4-methylbenzene-1,2-diol                                                                                   | 4-methylcatechol               | 95%<br>(Aldrich)    | Yes                                          | 29                                           |
| <b>4</b>  | benzene-1,2,3-triol                                                                                        | Pyrogallol                     | 99%<br>(Aldrich)    | Yes                                          | 73                                           |
| <b>5</b>  | 2,3-dihydroxybenzoic acid                                                                                  | 2,3-Dihydroxybenzoic acid      | 99%<br>(Aldrich)    | Yes                                          | 35                                           |
| <b>6</b>  | 3,4-Dihydroxybenzoic Acid                                                                                  | 3,4-Dihydroxybenzoic Acid      | 97%<br>(Aldrich)    | Yes                                          | 5                                            |
| <b>7</b>  | (E)-3-(3,4-dihydroxyphenyl)prop-2-enoic acid                                                               | Caffeic acid                   | 99%<br>(Sigma)      | No                                           | 7                                            |
| <b>8</b>  | (1S,3R,4R,5R)-3-[(E)-3-(3,4-dihydroxyphenyl)prop-2-enoyl]oxy-1,4,5-trihydroxycyclohexane-1-carboxylic acid | Chlorogenic acid               | 98%<br>(Aldrich)    | Yes                                          | 6                                            |
| <b>9</b>  | [(2R,3R)-5,7-dihydroxy-2-(3,4,5-trihydroxyphenyl)-3,4-dihydro-2H-chromen-3-yl]3,4,5-trihydroxybenzoate     | (-) Epigallocatechin gallate   | 80%<br>(Sigma)      | Yes                                          | 45                                           |
| <b>10</b> | Catechol cyclic sulfate                                                                                    | Catechol cyclic sulfonate      | 95%                 | No                                           | 6                                            |
| <b>11</b> | Catechol sulfate sodium                                                                                    | Catechol sulfonate sodium      | Salts               | No                                           | 4                                            |
| <b>12</b> | 2-methoxyphenol                                                                                            | Guaiacol                       | 98%<br>(Aldrich)    | No                                           | 4                                            |
| <b>13</b> | 1,2-Dimethoxybenzene                                                                                       | 1,2Dimethoxy benzene           | 99%<br>(Aldrich)    | No                                           | 3                                            |
| <b>14</b> | 2-amino-3-(3,4-dihydroxyphenyl)propanoic acid                                                              | 3,4-Dihydroxy-DL-phenylalanine | 97%<br>(Aldrich)    | Yes                                          | 12                                           |

|           |                                                                                           |                                  |                  |     |    |
|-----------|-------------------------------------------------------------------------------------------|----------------------------------|------------------|-----|----|
| <b>15</b> | 2-amino-3-(3,4-dihydroxy-phenyl)-propionic acid                                           | Dihydroxyphenyl alanine (L-DOPA) | 98%<br>(Sigma)   | Yes | 10 |
| <b>16</b> | 4-(2-amino-1-hydroxy-ethyl)-2-methoxy-phenol                                              | DL-Norepinephrine                | 97%<br>(Aldrich) | No  | 5  |
| <b>17</b> | (E)-3-(4-hydroxy-3-methoxyphenyl)prop-2-enoic acid                                        | Ferulic acid                     | 98%<br>(Fluka)   | No  | 3  |
| <b>18</b> | phenethyl<br>(E)-3-(3,4-dihydroxyphenyl)prop-2-enoate                                     | Caffeic acid<br>phenethyl ester  | 97%<br>(Sigma)   | No  | 8  |
| <b>19</b> | (2R)-3-(3,4-dihydroxyphenyl)-2-[(E)-3-(3,4-dihydroxyphenyl)prop-2-enoyl]oxypropanoic acid | Rosmarinic acid                  | 97%<br>(Aldrich) | Yes | 50 |
| <b>20</b> | 5-(2-aminoethyl)benzene-1,2,3-triol                                                       | 5-Hydroxydopamine                | 98%<br>(Aldrich) | No  | 10 |
| <b>21</b> | 5-(2-aminoethyl)benzene-1,2,4-triol                                                       | 6-Hydroxydopamine                | 95%<br>(Aldrich) | No  | 4  |
| <b>22</b> | 3,5,7-trihydroxy-2-(3,4,5-trihydroxyphenyl)chromen-4-one                                  | Myricetin                        | 85%<br>(Sigma)   | No  | 28 |
| <b>23</b> | 2, 3-Dimethoxybenzoic acid                                                                | 2,3-Dimethoxy benzoic acid       | 99%<br>(Aldrich) | No  | 6  |
| <b>24</b> | 2-amino-3-hydroxybenzoic acid                                                             | 3-Hydroxyanthranilic acid        | 97%<br>(Aldrich) | No  | 10 |
| <b>25</b> | 2-hydroxybenzoic acid                                                                     | Salicylic acid                   | 99%<br>(Sigma)   | No  | 15 |
| <b>26</b> | Ellagic acid                                                                              | Ellagic acid                     | 95%<br>(Sigma)   | Yes | 24 |
| <b>27</b> | 2-(2,5-dihydroxyphenyl)acetic acid                                                        | Homogentisic acid                | 98%<br>(Sigma)   | No  | 7  |
| <b>28</b> | 2,5-dihydroxybenzoic acid                                                                 | Gentistic Acid                   | 99%<br>(Sigma)   | No  | 6  |
| <b>29</b> | 2-amino-4-(2-amino-3-hydroxyphenyl)-4-oxobutanoic acid                                    | 3-Hydroxy-DL-kynurenine          | (Sigma)          | Yes | 3  |
| <b>30</b> | 2-amino-3-phenyl-propanoic acid                                                           | L-Phenylalanine                  | 98%<br>(Sigma)   | No  | 8  |
| <b>31</b> | 3-acetamido-3-phenylpropanoic acid                                                        | N-Acetyl-DL-phenylalanine        | 97%<br>(Sigma)   | No  | 5  |
| <b>32</b> | (2S)-2-amino-3-(1H-indol-3-yl)propanoic acid                                              | L-Tryptophan                     | 99%<br>(Sigma)   | No  | 5  |
| <b>33</b> | 2-amino-3-(5-hydroxy-1H-indol-3-yl)propanoic acid                                         | 5-Hydroxytryptophan              | 99%<br>(Sigma)   | No  | 4  |
| <b>34</b> | 5-Hydroxy-indoleacetic acid                                                               | 5-Hydroxy-Indole acetic acid     | 98%<br>(Sigma)   | No  | 7  |
| <b>35</b> | 1H-pyrimidine-2,4-dione                                                                   | Uracil                           | 99%<br>(Sigma)   | No  | 7  |
| <b>36</b> | 2,4-dioxo-1H-pyrimidine-6-carboxylic acid                                                 | Orotic acid                      | 98%<br>(Sigma)   | No  | 13 |

|           |                                                                                                                                                                                                                                  |                                 |                     |     |    |
|-----------|----------------------------------------------------------------------------------------------------------------------------------------------------------------------------------------------------------------------------------|---------------------------------|---------------------|-----|----|
| <b>37</b> | 2,6-dioxo-1,3-diazinane-4-carboxylic acid                                                                                                                                                                                        | DL-Dihydroorotic acid           | 98%<br>(Sigma)      | No  | 7  |
| <b>38</b> | pyridine-3-carboxylic acid                                                                                                                                                                                                       | Nicotinic acid                  | 99.5%<br>(Fluka)    | No  | 3  |
| <b>39</b> | 2, 3-Pyridinedicarboxylic acid                                                                                                                                                                                                   | 2, 3-Pyridine-dicarboxylic acid | 99%<br>(Aldrich)    | No  | 6  |
| <b>40</b> | 3-hydroxy-5-(hydroxymethyl)-2-methylpyridine-4-carbaldehyde                                                                                                                                                                      | Pyridoxal                       | 99%<br>(Sigma)      | No  | 1  |
| <b>41</b> | 3-hydroxy-5-(hydroxymethyl)-2-methyl-pyridine-4-carboxylic acid                                                                                                                                                                  | 4-Pyridoxic Acid                | 98%<br>(Sigma)      | No  | 12 |
| <b>42</b> | 2-(2-furylcarbonylamino)acetic acid                                                                                                                                                                                              | 2-Furoylglycine                 | 98%<br>(Aldrich)    | No  | 6  |
| <b>43</b> | 3-[5-(aminomethyl)-4-(carboxymethyl)-1H-pyrrol-3-yl]propanoic acid                                                                                                                                                               | Porphobilinogen                 | 97%<br>(Frontier)   | No  | 3  |
| <b>44</b> | 1-(2-aminoacetyl)pyrrolidine-2-carboxylic acid                                                                                                                                                                                   | Glycyl-L-proline                | 99%<br>(Aldrich)    | No  | 4  |
| <b>45</b> | 5-ureidohydantoin<br>(2,5-dioxoimidazolidin-4-yl)urea                                                                                                                                                                            | Allantoin                       | 98%<br>(Sigma)      | No  | 7  |
| <b>46</b> | 3-[2-[[3-(2-carboxyethyl)-5-[(Z)-(3-ethenyl-4-methyl-5-oxo-pyrrol-2-ylidene)methyl]-4-methyl-1H-pyrrol-2-yl]methyl]-5-[(Z)-(4-ethenyl-3-methyl-5-oxo-pyrrol-2-ylidene)methyl]-4-methyl-1H-pyrrol-3-yl]propanoic acid             | Bilirubin                       | Salts<br>(Frontier) | No  | 3  |
| <b>47</b> | 3-[2-[(E)-[(5E)-3-(2-carboxyethyl)-5-[(4-ethenyl-3-methyl-5-oxo-pyrrol-2-yl)methylidene]-4-methyl-pyrrol-2-ylidene]methyl]-5-[(E)-(3-ethenyl-4-methyl-5-oxo-pyrrol-2-ylidene)methyl]-4-methyl-1H-pyrrol-3-yl]propanoic acid. HCl | Biliverdin HCl                  | 97%<br>(Frontier)   | No  | 9  |
| <b>48</b> | 3-[2-[[3-(2-carboxyethyl)-5-[(3-ethyl-4-methyl-5-oxo-1,2-dihydropyrrol-2-yl)methyl]-4-methyl-1H-pyrrol-2-yl]methylidene]-5-[(4-ethyl-3-methyl-5-oxo-1,2-dihydropyrrol-2-yl)methyl]-4-methyl-pyrrol-3-yl]propanoic acid.HCl       | Urobilin HCl                    | Salts<br>(Frontier) | No  | 3  |
| <b>49</b> | 7,12-diethenyl-3,8,13,17-tetramethyl-21H,23H-Porphine-2,18-dipropanoic acid                                                                                                                                                      | Protoporphyrin IX               | 97%<br>(Frontier)   | No  | 3  |
| <b>50</b> | Riboflavin 5'-(trihydrogen diphosphate)                                                                                                                                                                                          | FAD                             | 95%<br>(Sigma)      | Yes | 6  |
| <b>51</b> | [(2R,3R,4R,5R)-2-(6-aminopurin-9-yl)-5-[[[(2R,3S,4R,5R)-5-(5-carbamoylpyridin-1-yl)-3,4-dihydroxy-oxolan-2-yl]methoxy-hydroxy-phosphoryl]oxy-hydroxy-phosphoryl]oxymethyl]-4-hydroxy-oxolan-3-yl]oxyphosphonic acid              | NADP                            | 97%<br>(Sigma)      | Yes | 7  |
| <b>52</b> | [(2R,3R,4R,5R)-5-(6-aminopurin-9-yl)-3-hydroxy-4-phosphonoxyoxolan-2-yl]methyl                                                                                                                                                   | NADPH                           | 95%<br>(Sigma)      | Yes | 3  |

|           |                                                                                                                                                                                            |                       |                  |     |    |
|-----------|--------------------------------------------------------------------------------------------------------------------------------------------------------------------------------------------|-----------------------|------------------|-----|----|
|           | [[[(2R,3S,4R,5R)-5-(3-carbamoyl-4H-pyridin-1-yl)-3,4-dihydroxyoxolan-2-yl]methoxy-hydroxyphosphoryl] hydrogen phosphate                                                                    |                       |                  |     |    |
| <b>53</b> | [(2S,3S,4R,5R)-5-(6-aminopurin-9-yl)-3,4-dihydroxy-oxolan-2-yl]methoxy-[[[(2S,3S,4R,5R)-5-(5-carbamoylpyridin-1-yl)-3,4-dihydroxy-oxolan-2-yl]methoxy-oxido-phosphoryl]oxy-phosphonic acid | NAD                   | 99%<br>(Sigma)   | No  | 12 |
| <b>54</b> | 2-[4-[(2-amino-4-hydroxy-pteridin-6-yl)methylamino]benzoyl]amino]pentanedioic acid                                                                                                         | Folic acid            | 98%<br>(Sigma)   | No  | 3  |
| <b>55</b> | but-2-enedioic acid                                                                                                                                                                        | Maleic acid           | 99%<br>(Fluka)   | No  | 4  |
| <b>56</b> | 2-hydroxypropane-1,2,3-tricarboxylic acid sodium                                                                                                                                           | Citric acid sodium    | (Sigma)          | Yes | 6  |
| <b>57</b> | Succinic acid                                                                                                                                                                              | Succinic acid         | 99%<br>(Sigma)   | No  | 11 |
| <b>58</b> | 5-amino-4-oxo-pentanoic acid                                                                                                                                                               | 5-Aminolevulinic acid | 98%<br>(Sigma)   | No  | 3  |
| <b>59</b> | (1Z)-1-Propene-1,2,3-tricarboxylic acid                                                                                                                                                    | Cis-Aconitic acid     | 98%<br>(Aldrich) | No  | 11 |
| <b>60</b> | 1-hydroxypropane-1,2,3-tricarboxylic acid                                                                                                                                                  | Isocitric acid        | 98%<br>(Sigma)   | Yes | 6  |
